# Supplementary material
Source: HighWire-hosted journal article supplement (https://www.annfammed.org/highwire/filestream/622/field_highwire_adjunct_files/0/Wasserman_Supp_Apps.pdf)
Supplement: Wasserman_Supp_Apps.pdf [file Wasserman_Supp_Apps.pdf]

## Supplemental materials for

Wasserman RC, Varni SE, Hollander MC, Harder VS. Change in site of children's primary care: a longitudinal population-based analysis. *Ann Fam Med.* 2019;17(5):390-395.

Supplemental Table: Current Procedural Terminology (CPT), International Classification of Disease (ICD) Codes, and Provider Taxonomies Used to Identify Providers and Visit Types for the Attribution of Children to Providers

|                                  | CPT Code                                                                                                                                                                                                       | ICD9-CM Code                                                         | ICD10-CM Code                                                                                   |
|----------------------------------|----------------------------------------------------------------------------------------------------------------------------------------------------------------------------------------------------------------|----------------------------------------------------------------------|-------------------------------------------------------------------------------------------------|
| Well-Child Visits                | 99381-99385<br>99391-99395<br>99432<br>99461                                                                                                                                                                   | V20.2<br>V20.3<br>V70.0<br>V70.3<br>V70.5<br>V70.6<br>V70.8<br>V70.9 | Z00.129<br>Z00.110<br>Z00.111<br>Z00.00<br>Z02.89<br>Z20.1<br>Z02.3<br>Z02.89<br>Z00.8<br>Z00.5 |
| Evaluation and Management Visits | 99201-99205<br>99211-99215<br>99341-99345<br>99347-99350<br>(HCPCS Code) T1015*                                                                                                                                |                                                                      |                                                                                                 |
| Other Preventive Visits          | 99401-99404<br>99411-99412<br>99420<br>99429<br>99406-99409<br>96110-96111<br>99441-99444<br>99339-99340<br>99173-99174<br>92551-92552<br>92567<br>90460-90461<br>90471-90474<br>90465-90468<br>90470<br>99050 | V64.00<br>V64.01<br>V64.02<br>V64.03<br>V64.04<br>V64.05<br>V64.06   | Z28.9<br>Z28.01<br>Z28.02<br>Z28.03<br>Z28.04<br>Z28.21<br>Z28.81<br>Z28.82                     |
| Provider Taxonomy                |                                                                                                                                                                                                                |                                                                      |                                                                                                 |
| Primary Care Taxonomies for      | 208000000X                                                                                                                                                                                                     | 363LP0200X                                                           |                                                                                                 |

|                                                |                                                                    |                          |
|------------------------------------------------|--------------------------------------------------------------------|--------------------------|
| Pediatric and Family Medicine<br>Practitioners | 2080A0000X<br>2080P0006X<br>2080X0001X<br>207Q00000X<br>207QA0000X | 364SP0200X<br>363LF0000X |
|------------------------------------------------|--------------------------------------------------------------------|--------------------------|

\*Note: T1015 identifies an Evaluation and Management visit if it is not accompanied by any ICD9-CM or ICD10-CM first or second diagnosis identified for Well-Child Visits

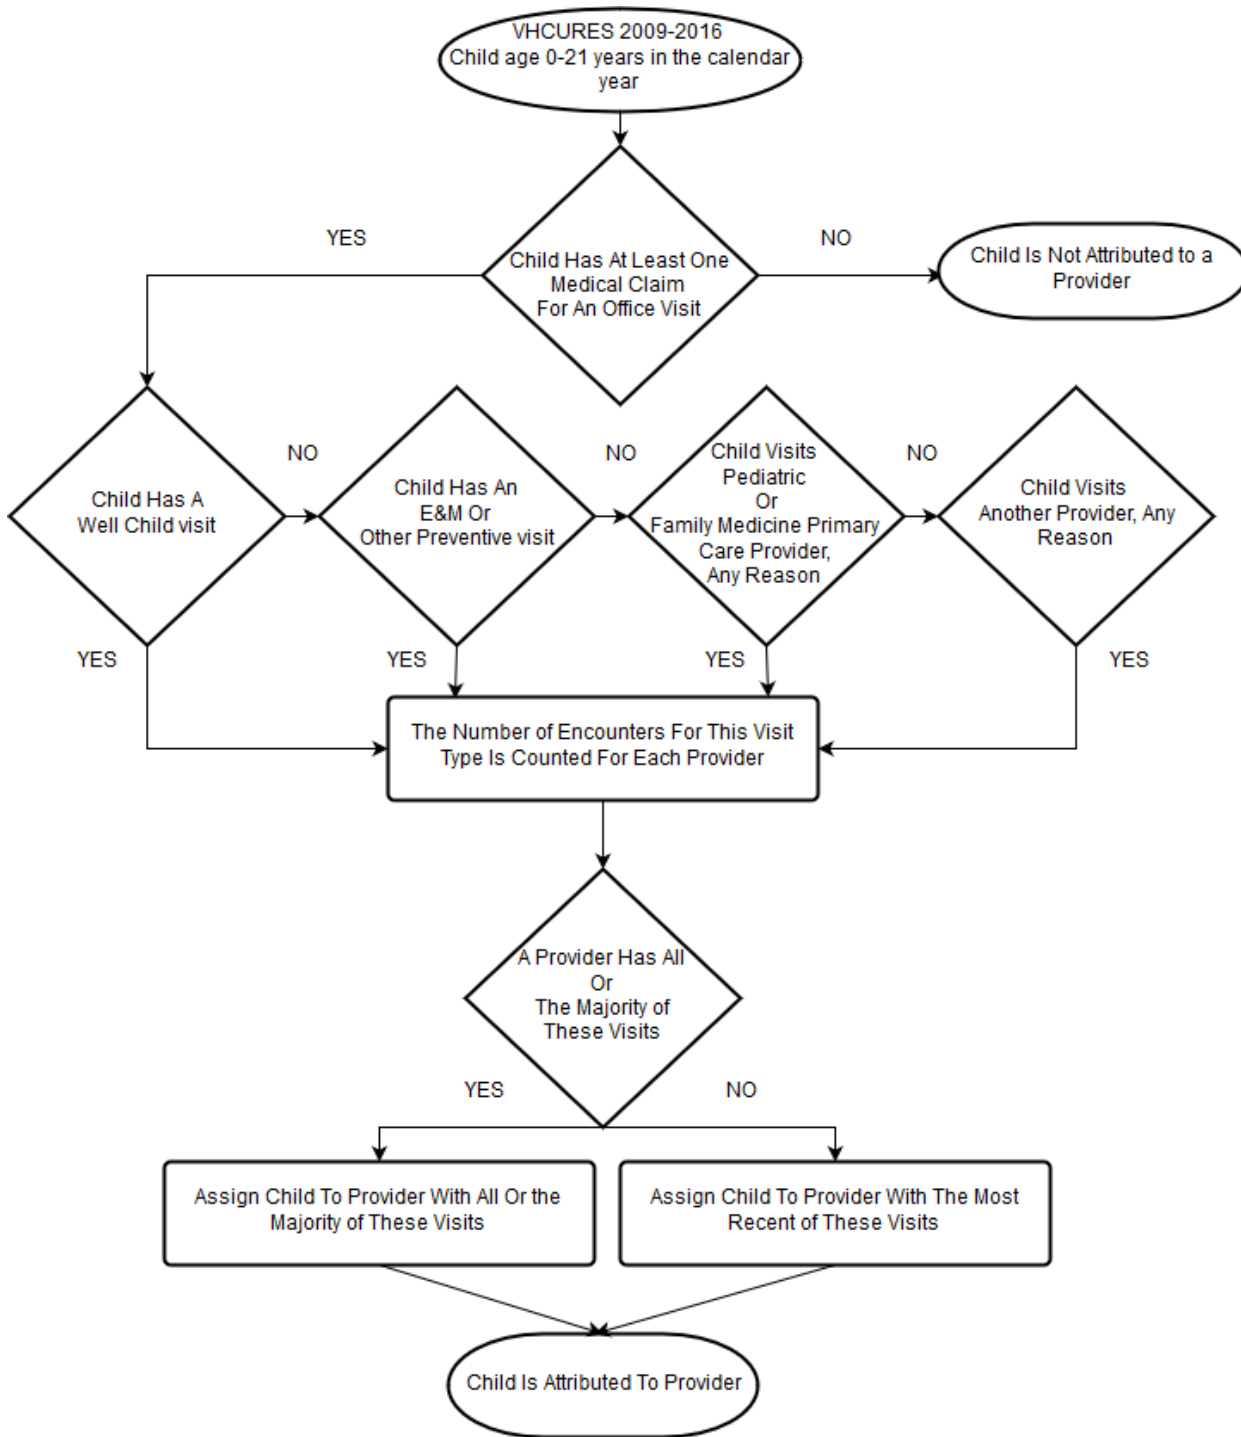

Supplemental Figure: Graphical depiction of our hierarchical approach assigning children to providers
